# Supplementary material for: Vivianite formation in methane-rich deep-sea sediments from the South China Sea
Source: Copernicus journal article supplement (doi:10.5194/bg-15-6329-2018), 2018-10-26
Supplement: Supplementary file 1 [file bg-15-6329-2018-supplement.zip]

Archive with 2 entries (2 files):
- Supplementary information.xlsx
- bg-15-6329-2018-supplement-title-page.pdf
