# Supplementary material for: Vivianite formation in methane-rich deep-sea sediments from the South China Sea
Source: Copernicus journal article supplement (doi:10.5194/bg-15-6329-2018), 2018-10-26
Supplement: Supplementary file 1 [file bg-15-6329-2018-supplement.zip › bg-15-6329-2018-supplement-title-page.pdf]

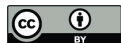

## *Supplement of*

# **Vivianite formation in methane-rich deep-sea sediments from the South China Sea**

**Jiarui Liu et al.**

*Correspondence to:* Jiasheng Wang ([js-wang@cug.edu.cn](mailto:js-wang@cug.edu.cn))

- [bg-15-6329-2018-supplement-title-page.pdf](#)
- [Supplementary information.xlsx](#)

The copyright of individual parts of the supplement might differ from the CC BY 4.0 License.
