# Supplementary material for: Vivianite formation in methane-rich deep-sea sediments from the South China Sea
Source: Copernicus journal article supplement (doi:10.5194/bg-15-6329-2018), 2018-10-26
Supplement: Supplementary file 1 [file Supplementary information.xlsx]

## Sheet: Fig. 2 & 7
Depth (cm)	Vivianite (wt. ‰)	Iron-rich silicates (wt. ‰)	>65 μm (%)
17.5	0	0	1.05616
27.5	0	0	0.708751
37.5	0	0.0398314	0.622697
47.5	0	0	0.983668
57.5	0	0	0.992873
67.5	0	0	0.987615
77.5	0	0	1.71937
85.5	0	0.0434834	0.938993
91.5	0	0	0.656268
97.5	0	0	0.84956
103.5	0	0	0.396461
109.5	0	0.427985	0.900603
115.5	0	0	0.537287
121.5	0	0	0.530252
128	0	0	0.383523
134.5	0	0	0.476844
140.5	0	0	0.561553
146.5	0	0	0.531075
152.5	0	0	0.604228
158.5	0	0	1.25887
164.5	0	0	0.556222
170.5	0	0	1.27904
176.5	0	0	0.870028
181.5	0	0	0.585566
187.5	0	0	0.940952
193.5	0	0	1.02469
199.5	0	0	1.03193
205.5	0	0	0.649671
211.5	0	0	0.58267
217.5	0	0	1.19723
223.5	0	0	1.08908
229	0	0	1.56959
234.5	0	0	1.18026
240.5	0	0	0.686237
246.5	0	0	0.839642
252.5	0	0	1.12163
258.5	0	0	0.564145
264.5	0	0	0.319118
270.5	0	0	0.583553
276.5	0	0	0.874422
281.5	0	0	0.425948
287.5	0	0	0.938814
293.5	0	0.0324646	0.896672
299.5	0	0	0.815896
305.5	0	0	0.789217
311.5	0	0	0.850652
317.5	0	0	0.605177
323.5	0	0	0.838515
329	0	0	1.46019
334.5	0	0	0.411967
340.5	0	0	1.45514
346.5	0	0	0.975317
352.5	0	0	0.588157
358.5	0	0	0.374022
364.5	0	0	0.410173
370.5	0	0	0.491948
376.5	0	0	0.194139
381.5	0	0	0.716404
387.5	0	0	0.488103
393.5	0	0	0.241801
399.5	0	0	0.343531
405.5	0	0	0.35843
411.5	0	0	0.19389
417.5	0	0	0.439678
423.5	0	0	0.786396
445	0	0	0.738064
454.5	0	8.48474	42.088
460.5	0	8.42684	44.8189
466.5	0	6.14045	23.7045
472.5	0	0.696065	15.7064
478.5	0	0.528157	13.5418
484.5	0	2.11861	19.775
487.5	0	0.466995	17.4765
490.5	0	2.49142	18.4747
493.5	0	1.90303	21.7681
496.5	0	0.278269	18.1958
499.5	0	0.973429	11.4831
502.5	0	0.362088	10.0339
505.5	0	2.41537	15.3854
508.5	0	0.868636	14.3779
511.5	0	1.42134	21.6071
514.5	0	2.2631	18.4181
517.5	0	0.236741	12.972
520.5	0	0.839442	13.4886
523.5	0	0.138658	13.7168
526.5	0	0.460524	15.1087
529	0	0.507427	15.8981
531.5	0	0.475927	27.668
534.5	0	0.596228	19.9737
537.5	0	0.258826	12.9981
540.5	0	0.208278	12.353
543.5	0	0.373736	13.8577
546.5	0	0.0838469	17.2707
549.5	0	0.083261	19.6795
552.5	0	0.915175	27.3771
555.5	0	0.726151	28.4724
558.5	0	0.0718086	26.7064
561.5	0	0.292051	23.4278
564.5	0	0.630292	19.4945
567.5	0	1.39939	16.0665
570.5	0	1.13212	13.1394
573.5	0	0.855664	13.6016
576.5	0	2.89799	15.5631
579	0	1.64085	20.119
581.5	0	1.67888	19.1071
584.5	0	2.38003	22.0362
587.5	0	1.06431	19.8794
590.5	0	1.45182	16.6903
593.5	0	0.940461	19.6003
596.5	0	0.658623	18.6327
599.5	0	4.16286	13.9349
602.5	0	4.23919	13.9327
605.5	0	0.89863	2.80542
608.5	0	0	0.45961
611.5	0	0.101648	0.534667
617.5	0	0	0.402355
623.5	0	0.0438876	0.607075
629	0	0.110077	1.61483
634.5	0	0	0.235853
640.5	0	0	0.370538
646.5	0	0.480924	0.58875
652.5	0	0.0392938	0.218923
658.5	0	0.0680172	0.353803
664.5	0	0	0.13398
670.5	0	0.126101	0.696573
676.5	0	0.0857353	0.460773
681.5	0	0	0.383828
687.5	0	0	0.209417
693.5	0	0.0814593	0.656236
699.5	0	0.0535014	0.674278
705.5	0	0.0992131	1.20142
711.5	0	0.108019	0.958883
717.5	0	0.0378618	0.397441
723.5	0	0	0.462465
729	0	0.0408493	0.926155
734.5	0	0	0.247619
740.5	0	0.038738	0.242389
746.5	0	0.16274	0.161492
752.5	0	0	0.0695106
758.5	0	0.0325094	0.284295
764.5	0	0.0713181	0.62727
770.5	0	0.139252	0.614716
776.5	0	0	0.177634
782.5	0	0.07736	1.75215
792.5	0	0	0.717285
802.5	0	0.0395565	0.837694
812.5	0	0	0.654772
819.5	0	0	0.345727
825.5	0	0.00562047	0.410463
831.5	0	0.124185	0.387401
837.5	0	0.0972023	0.75389
846	0	0.102464	1.33322
859.5	0	0	0.214245
868.5	0	0	0.539275
878	0	0	0.880264
884.5	0	0.0211707	0.818884
890.5	0	0.0618808	0.657006
896.5	0	0.0523264	0.682389
902.5	0	0.0220724	0.986414
908.5	0	0	0.241727
914.5	0.0224857	0.0337285	0.17803
920	0.644843	0.442979	0.343617
925.5	0.161084	0.860968	0.216519
931.5	0.431368	0	0.663865
937.5	0.109101	0.0818255	0.367287
943.5	1.58475	0	0.54969
949.5	0.091954	1.48749	0.487356
955.5	0.138863	0.0160226	0.25241
961.5	0.20917	0.33789	0.243603
968	0.100523	0	0.176708
974.5	0.117223	0	0.0684154
980.5	0.120455	0.0209488	0.097726
986.5	0.0704367	0.260074	0.110965
992.5	0.7252	0.00510704	0.136103
998.5	0.201027	0	0.0817335
1004.5	0.0255184	0.102074	0.0853336
1010.5	0.0488563	0.07817	0.0653208
1016.5	0.158744	0.19971	0.0877701
1021.5	0.0148725	0	0.648344
1027.5	0.109558	0.0991241	0.10215
1033.5	0.0803794	0	0.105649
1044.5	0.0878204	0.537254	0.175227
1050.5	0.0296955	0.737438	0.174362
1056.5	0.51261	0	0.189617
1062.5	0.0585189	0	0.0824629
1068.5	0.0491106	0	0.369312
1075.5	0.0825155	0.201131	0.097162
1081.5	0.186502	0.19183	0.100338
1087.5	0.163584	0.854859	0.212237
1093.5	0.394544	0.741742	0.195746
1099.5	0.199837	0	0.0696932
1105.5	0.681711	0.194064	0.519344
1111.5	0.896556	0.309157	0.203374
1116.5	0.173659	1.13389	0.559999
1122.5	0.231774	0.0421408	0.187842
1128.5	0.249332	0	0.0890114
1134.5	0.0977648	0.0360186	0.12694
1140.5	0.103389	0.139575	0.0984781
1148.5	0.554564	0.655394	0.311715
1156.5		0	0.119671
1165.5	0.0669316	0	0.0593632
1174.5	0.4779	0	0.0948008
1183.5	0.117117	0.259694	0.117321
1189.5	0.280453	0	0.0479775
1195.5	0.12115	0	0.0566245
1201.5	0.114088	0	0.0810023
1207.5	0.0554357	0	0.041224
1213.5	0.356087	0	0.0816419
1219.5	0.0857242	0	0.0922071
1225.5	0.133786	0.0360193	0.0603581
1231.5	0.14047	0	0.0557197
1243.5	0.240758	0.136081	0.1007
1249.5	0.126444	0.0549756	0.0871912
1256.5	0.199342	0	0.22316
1262.5	0.0280511	0.145866	0.0597489
1268.5	0.291424	0	0.0583326
1274.5	0.221674	0.130113	0.0763329
1280.5	0.0192621	2.93747	0.380522
1286.5	0.183436	0.54548	0.12044
1292	0	0.101307	0.05116
1296.5	0.105486	0.474689	1.16051
1302.5	0.0965051	0.0643368	0.0429678
1308.5	0.0835299	0	0.0489387
1314.5	0.150586	0.0631488	0.0318173
1320.5	0.0895825	0	0.122479
1326.5	0.104273	0.0805744	0.0991066
1332.5	0.32358	0	0.070569
1338.5	0.0651126	0	0.120358
1344	0.225855	0	0.0338322
1352.5	0.115406	0.0401413	0.085501
1367.5	0.248905	0.445157	0.391786

## Sheet: Fig. 8
Depth (cm)	Reactive iron oxides (μmol g-1)	Iron (oxy)hydroxides (μmol g-1)	Reactive manganese (μmol g-1)
17.5	206.432	71.3151	3.35091
106.5	159.421	69.448	2.86364
217.5	144.246	63.7877	2.88909
323.5	157.364	63.2914	3.35091
420.5	142.332	66.2073	2.73636
499.5	92.4133	49.9065	1.99455
540.5		40.5325
564.5	75.6792	34.08	1.61091
579		36.2725
626.5	109.573	58.7254	2.73636
670.5	103.404	68.3795	2.78727
731.5	102.198	66.2536	3.37636
779	108.367	73.9968	3.19636
822.5	105.957	72.6068	4.04
871.5	127.938	93.7145	4.22
899.5	238.057	173.345	3.70909
905.5		170.121
928.5	175.091	124.16	4.01455
958.5	189.272	128.126	3.98909
995.5	181.331	123.174	4.44909
1019.5	174.098	128.892	4.60364
1056.5	169.135	133.644	4.34727
1096.5	197.001	150.068	3.73455
1131.5	234.511	161.333	4.06545
1168.5	204.234	139.298	4.22
1204.5	205.794	139.594	4.01455
1246.5	219.195	159.077	4.52727
1271.5	197.639		4.04
1283.5	195.016	143.429	4.24545
1323.5	202.036	153.401	4.39818
1372.5	204.588	150.774	4.27091
